# Supplementary material for: p38α MAPK Regulates Lineage Commitment and OPG Synthesis of Bone Marrow Stromal Cells to Prevent Bone Loss under Physiological and Pathological Conditions
Source: PubMed Central journal article supplement — Stem Cell Reports. 2016 Mar 3;6(4):566–78. doi: 10.1016/j.stemcr.2016.02.001 (PMC4834033; doi:10.1016/j.stemcr.2016.02.001), 2016-03-03
Supplement: mmc1.pdf [file mmc1.pdf]

**Stem Cell Reports, Volume 6**

**Supplemental Information**

**p38 $\alpha$  MAPK Regulates Lineage Commitment and OPG Synthesis of Bone Marrow Stromal Cells to Prevent Bone Loss under Physiological and Pathological Conditions**

**Qian Cong, Hao Jia, Soma Biswas, Ping Li, Shoutao Qiu, Qi Deng, Xizhi Guo, Gang Ma, Jenny Fang Ling Chau, Yibin Wang, Zhen-Lin Zhang, Xinquan Jiang, Huijuan Liu, and Baojie Li**

Figure S1

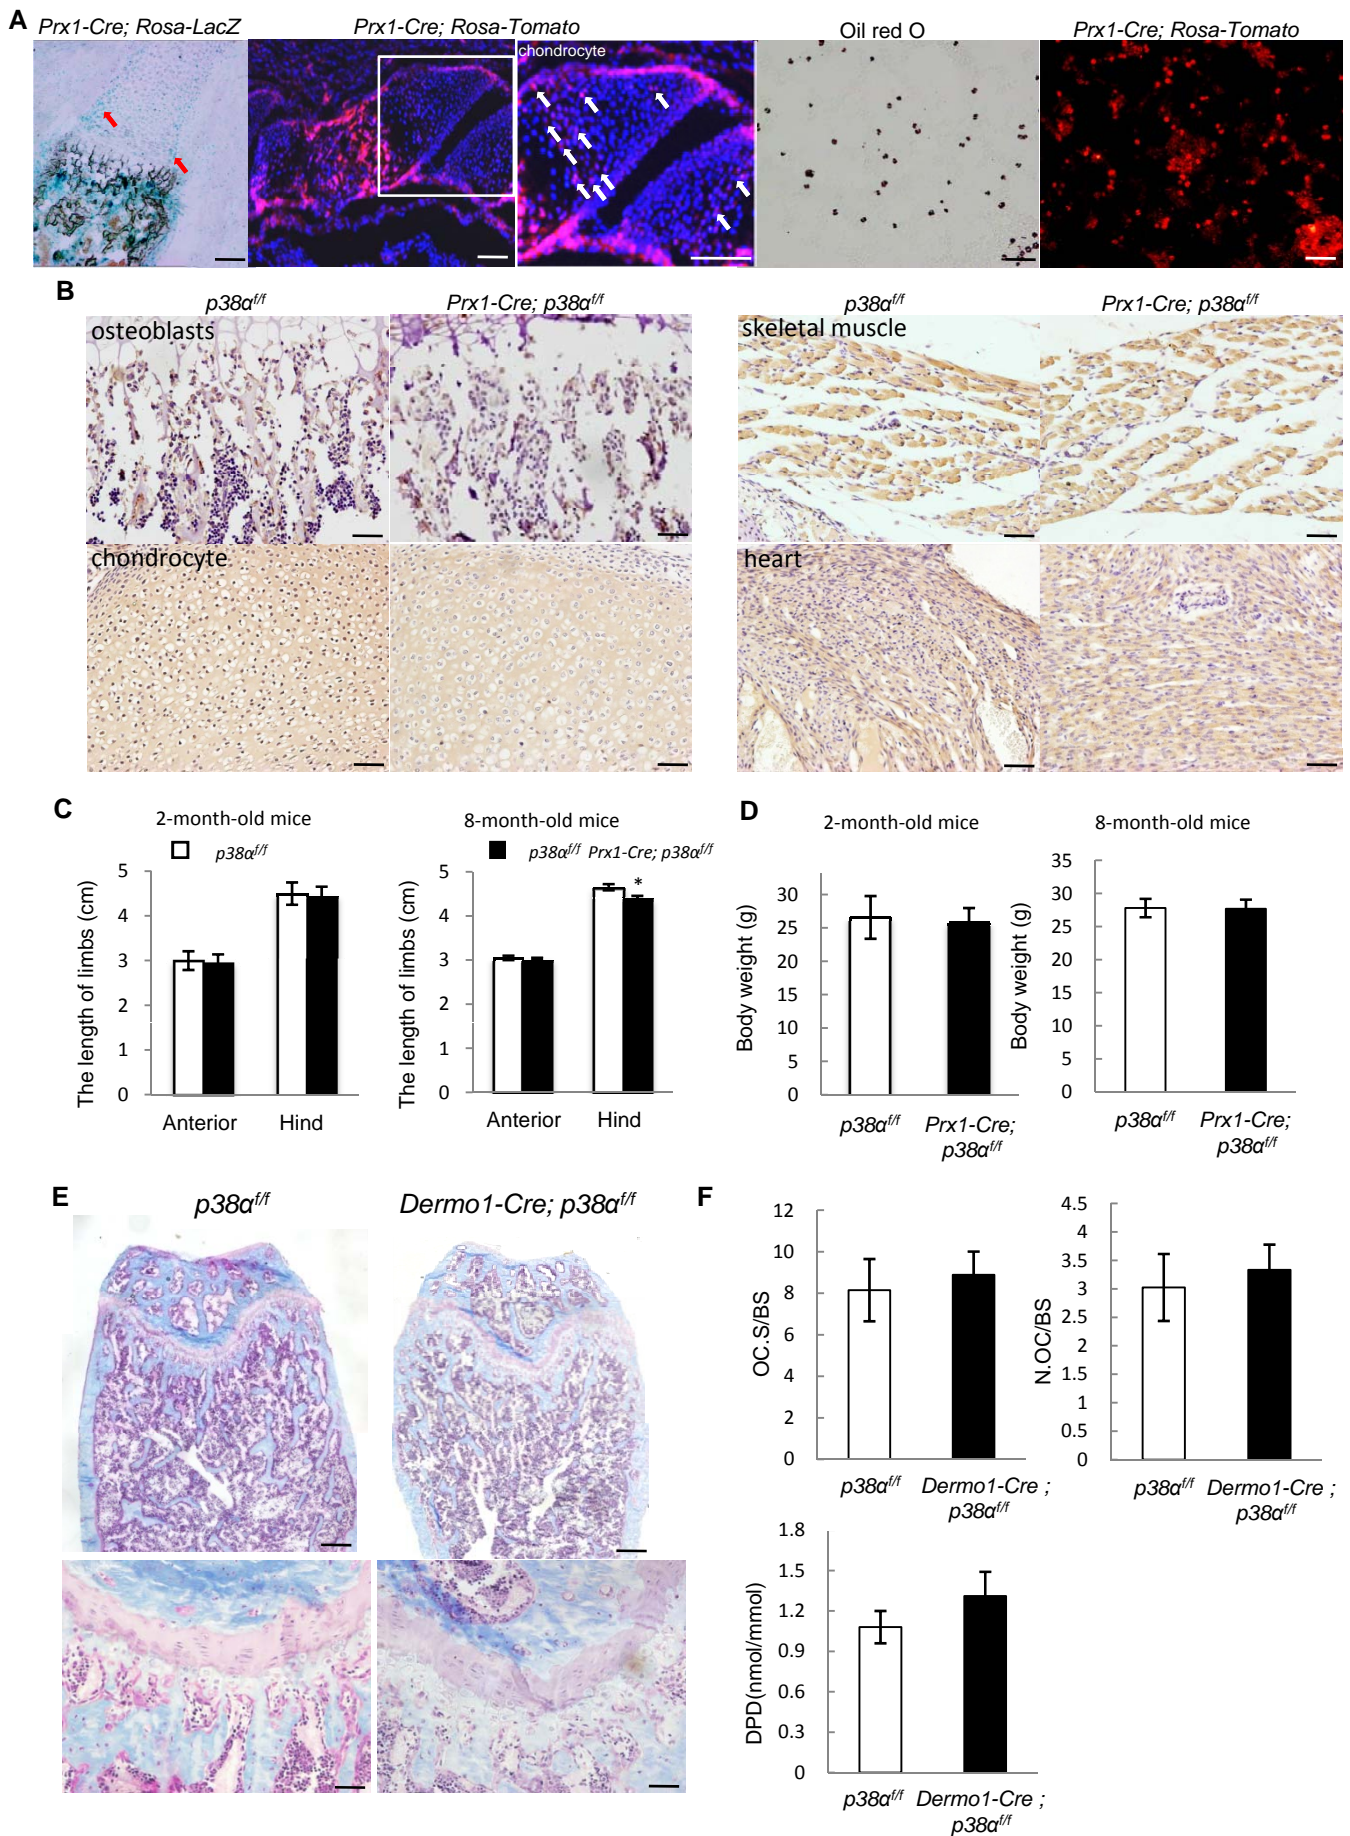

Figure S2

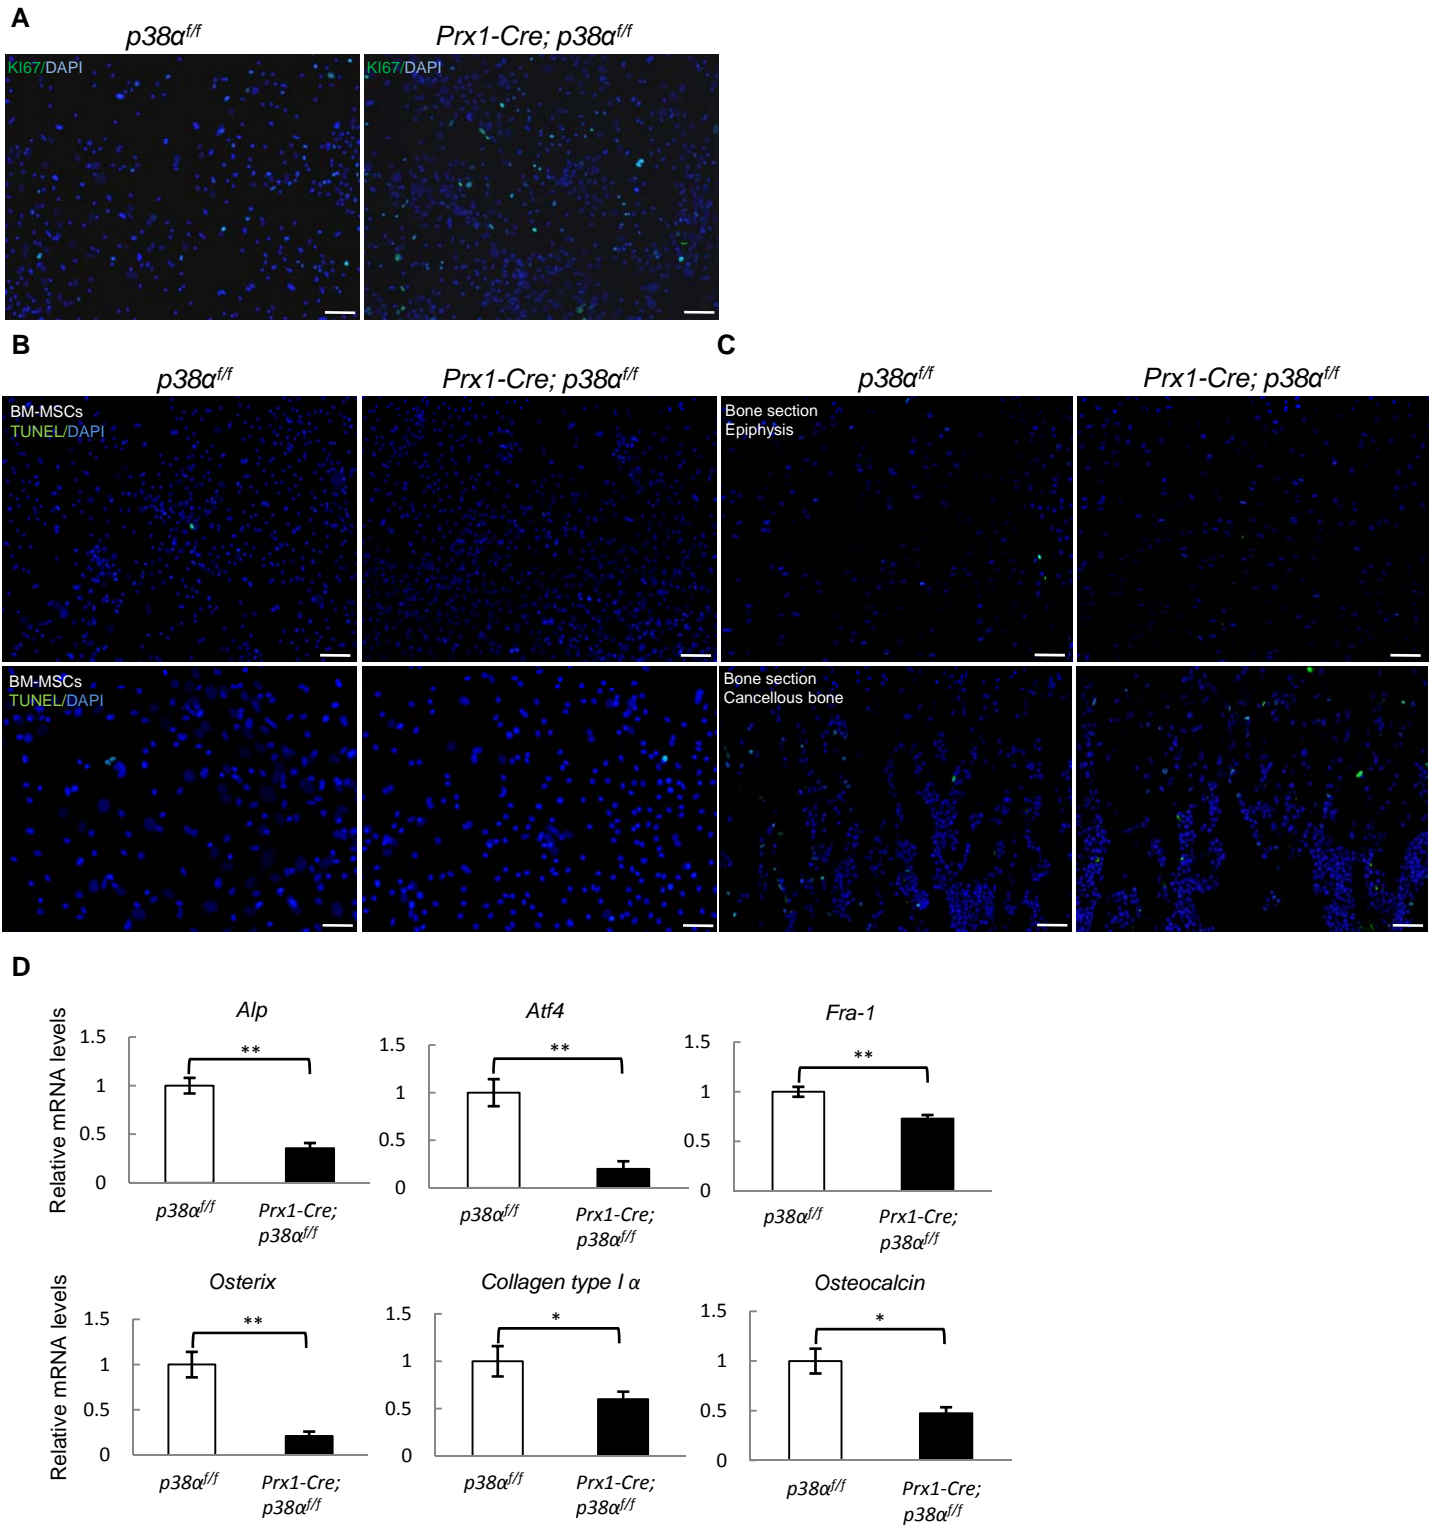

Figure S3

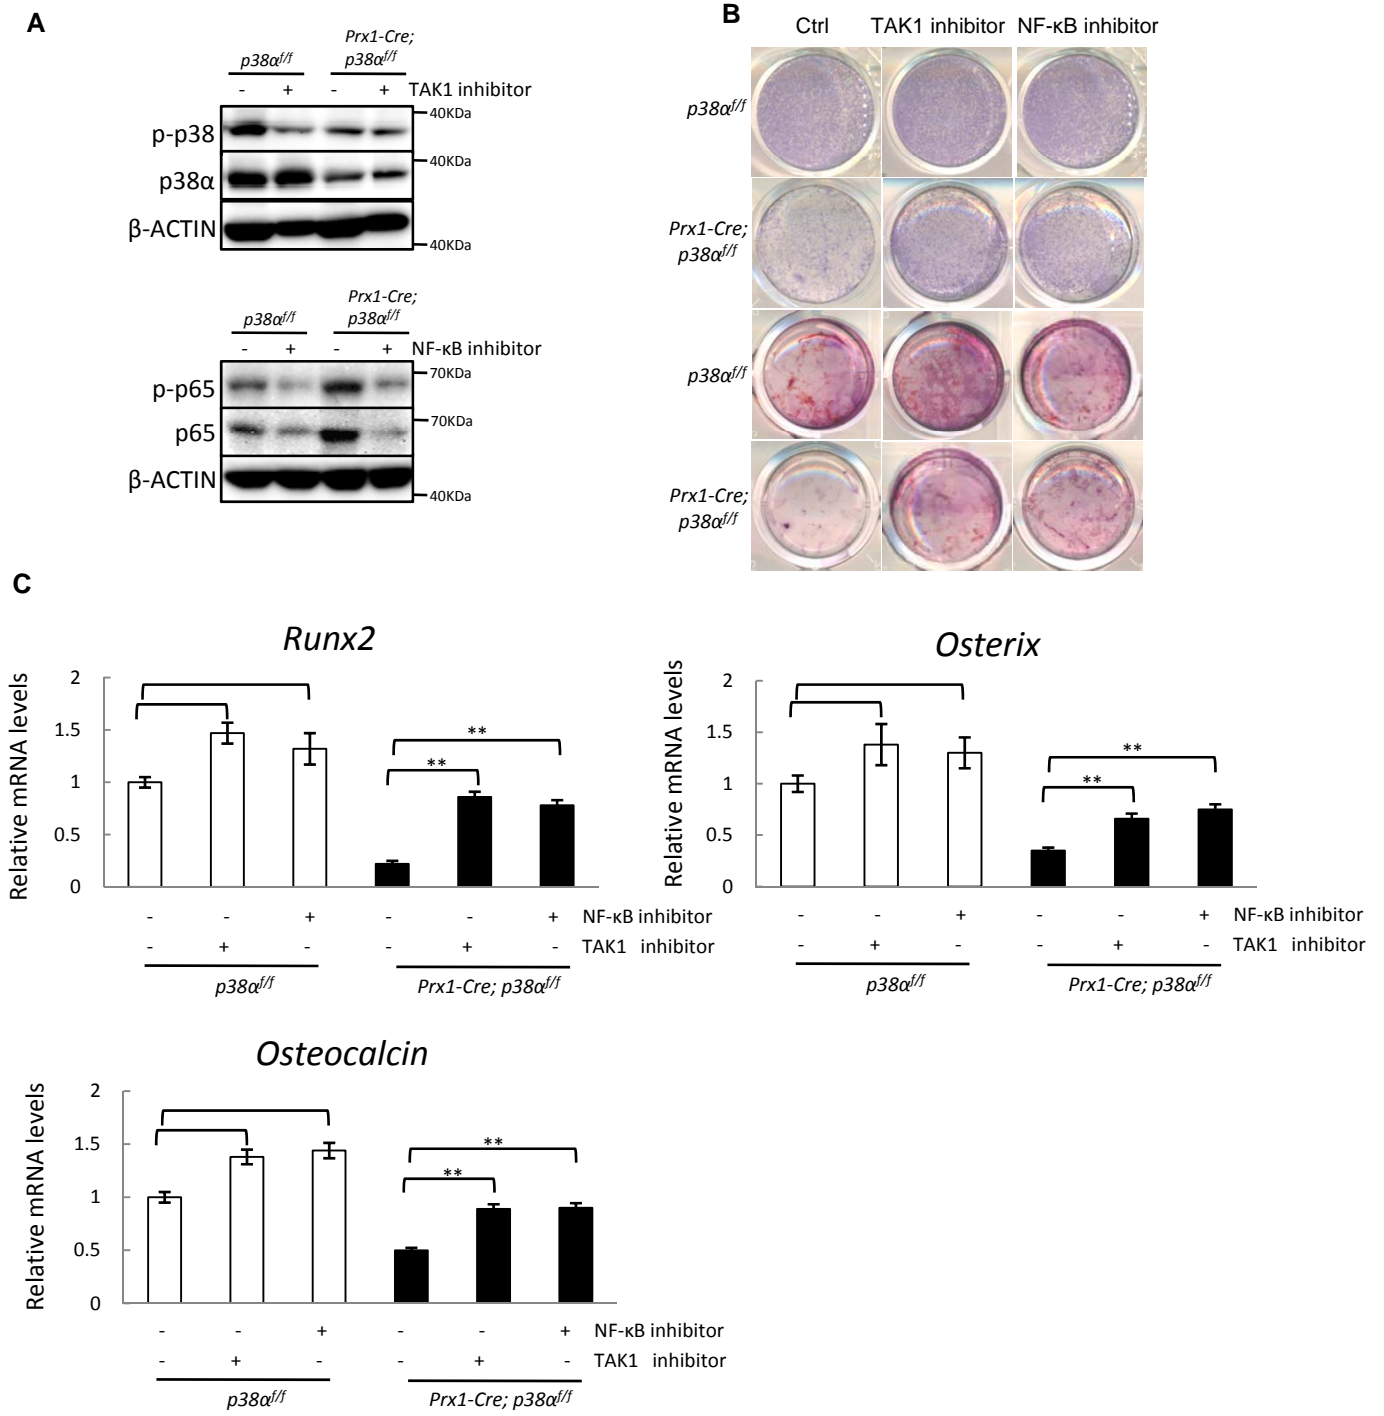

Figure S4

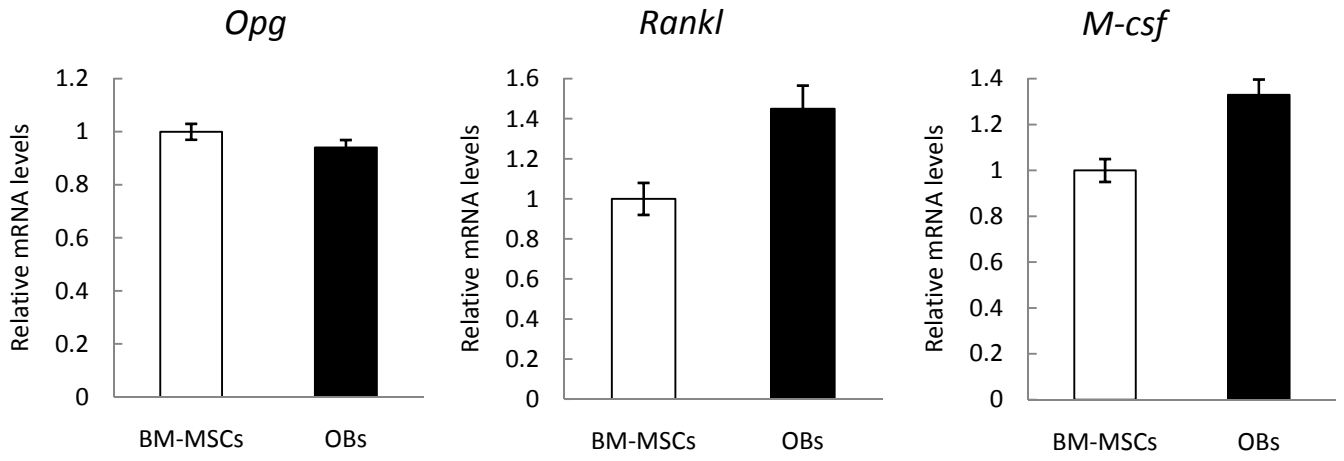

Figure S5

A

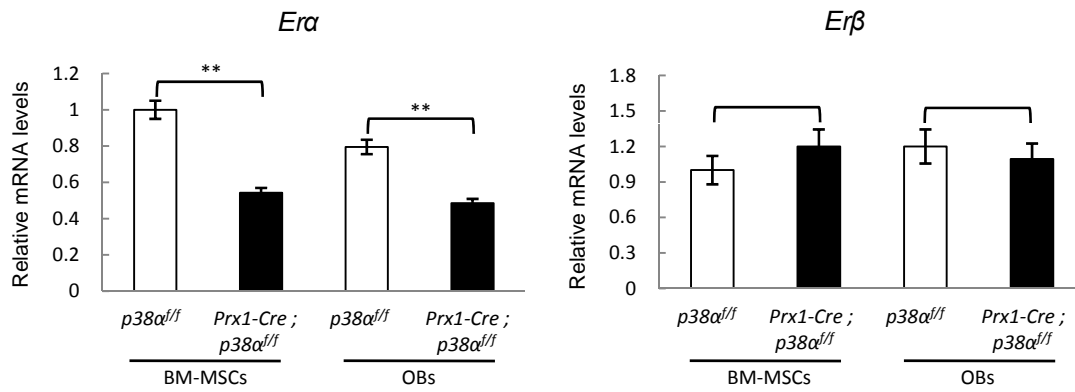

B

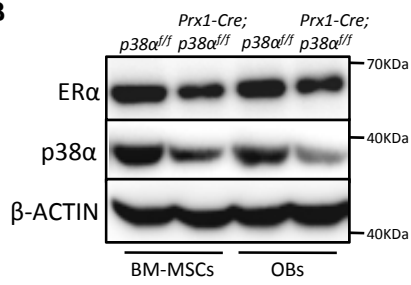

C

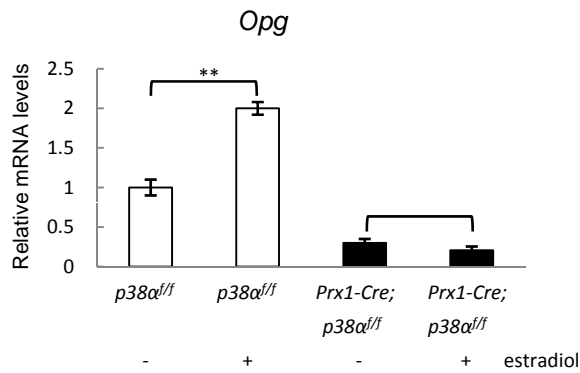

## Supplemental Figure Legends

**Figure S1. Ablation of  $p38\alpha$  in  $Prx1+$  BM-MSCs leads to shortened limb length, related to Figure 1.** (A) Lineage tracing of  $Prx1+$  cell in the osteoblasts, chondrocytes, and bone marrow fat in mouse. New-born  $Prx1-Cre; Rosa-tdTomato$  and  $Rosa-LacZ$  mice were used (Scale bar, 100  $\mu\text{m}$ ). The bone marrow smear was used to detect bone marrow adipocytes in adult  $Prx1-Cre; Rosa-tdTomato$  (Scale bar, 50  $\mu\text{m}$ ). Arrows indicate chondrocytes. (B) Immunohistochemical staining shows that p-p38 was greatly reduced in the bone but not in the heart or skeletal muscle of  $Prx1-Cre; p38\alpha^{ff}$  mice. Scale bar, 50  $\mu\text{m}$ . (C) The hind limb was slightly shortened in 8-month-old  $Prx1-Cre; p38\alpha^{ff}$  mice. (D) Two or eight-month-old  $Prx1-Cre; p38\alpha^{ff}$  mice showed normal body weight. Data represent means  $\pm$  SEM of eight independent experiments, \* $p < 0.05$  when the value in mutant mice was compared to that of control mice. (E)  $Dermo1-Cre; p38\alpha^{ff}$  mice did not show a significant defect in growth plate. Upper panel: Scale bar, 200  $\mu\text{m}$ . Bottom panel: Scale bar, 50  $\mu\text{m}$ . (F)  $Dermo1-Cre; p38\alpha^{ff}$  mice did not show a significant defect in bone resorption rate. Data represent means  $\pm$  SEM of eight independent experiments.

**Figure S2. BM-MSCs isolated from  $Prx1-Cre; p38\alpha^{ff}$  mice showed enhanced proliferation and defective osteogenic differentiation without affecting apoptosis, related to Figure 2.** (A)  $p38\alpha^{-/-}$  BM-MSC cultures showed an increase in the number of KI67 positive cells. Scale bar, 100  $\mu\text{m}$ . (B)  $p38\alpha^{-/-}$  BM-MSC cultures showed no alteration in TUNEL positive cells compared to WT BM-MSC cultures. (C)  $Prx1-Cre; p38\alpha^{ff}$  mouse femur sections showed no alteration in TUNEL positive cells compared to WT mouse. Scale bar, 100  $\mu\text{m}$ . (D) Quantitative PCR results revealed that  $p38\alpha^{-/-}$  BM-MSC cultures showed a decrease in the mRNA levels of osteogenic differentiation markers. Data represent means  $\pm$  SEM of three independent experiments, \* $p < 0.05$ , \*\* $p < 0.01$ .

**Figure S3. Inhibition of TAK1 or NF- $\kappa$ B with small molecule compounds rescued the osteogenic differentiation defect of  $p38\alpha^{-/-}$  BM-MSCs, related to Figure 3.** WT and

*p38α*<sup>-/-</sup> BM-MSCs were cultured in osteoblast differentiation medium for 4 days in the presence of TAK1 inhibitor (5Z-7-Oxozeaenol, 0.1 μM) or NF-κB inhibitor (BAY11-7082, 10μM). (A) Western blot results show that inhibition of TAK1 led to a decrease in p38 MAPK activation (upper panel) and inhibition of NF-κB led to a decrease in p65 phosphorylation (bottom panel). (B) The ALP staining results showed that inhibition of TAK1 or NF-κB with small molecule compounds rescued the osteogenic differentiation defect of *p38α*<sup>-/-</sup> BM-MSCs. (C) Quantitative PCR results confirmed that inhibition of TAK1 or NF-κB with small molecule compounds rescued the osteogenic differentiation defect of *p38α*<sup>-/-</sup> BM-MSCs. Data represent means ± SEM of three independent experiments, \*\*p<0.01.

**Figure S4. BM-MSCs and osteoblasts did not show a significant difference in expression of *Opg*, *Rankl*, or *M-csf*, related to Figure 4.** BM-MSCs and differentiated osteoblasts (induced by BMP2) cultures were collected, from which total RAN was isolated. Quantitative PCR was used to determine the mRNA levels of *Opg*, *Rankl*, and *M-csf*, with *Actin* as an internal control. Data represent means ± SEM of three independent experiments.

**Figure S5. *p38α*<sup>-/-</sup> BM-MSCs and osteoblasts showed decreased expression of ERα but not ERβ, related to Figure 6.** (A) BM-MSCs and osteoblasts cultures were collected, from which total RNA was isolated. Quantitative PCR was used to determine the mRNA levels of *Erα* and *Erβ*. (B) Western blot showed that *p38α*<sup>-/-</sup> BM-MSCs and osteoblasts expressed decreased levels of ERα at the protein levels compared to control counterparts. (C) *p38α*<sup>-/-</sup> osteoblasts also showed a decrease in *Opg* expression in response to estradiol. Data represent means ± SEM of three independent experiments, \*\*p<0.01.



**Supplemental Table S1.** Histomorphometry parameters of 3-month-old *Dermo1-Cre; p38 $\alpha$ <sup>ff</sup>* and control mice, related to Table 1. Data represent means  $\pm$  SEM of eight independent experiments, \* p<0.05 when the value of mutant mice was compared to that of control mice.

|                   | <i>p38<math>\alpha</math><sup>ff</sup></i> | <i>Dermo1-Cre; p38<math>\alpha</math><sup>ff</sup></i> |
|-------------------|--------------------------------------------|--------------------------------------------------------|
| <b>BV/TV(%)</b>   | 15.377 $\pm$ 1.97                          | 11.11 $\pm$ 3.44*                                      |
| <b>Tb.Ar(%)</b>   | 13.034 $\pm$ 1.45                          | 9.887 $\pm$ 2.61*                                      |
| <b>Tb.Th(mcm)</b> | 25.449 $\pm$ 2.02                          | 20.333 $\pm$ 3.13*                                     |
| <b>Tb.Sp(mcm)</b> | 238.154 $\pm$ 20.86                        | 377.625 $\pm$ 116.59*                                  |
| <b>Tb.N(#/mm)</b> | 4.655 $\pm$ 1.11                           | 3.289 $\pm$ 0.99*                                      |
| <b>MAR(mcm/d)</b> | 1.521 $\pm$ 0.142                          | 1.339 $\pm$ 0.076*                                     |
| <b>BFR(mcm/d)</b> | 70.445 $\pm$ 4.125                         | 60.356 $\pm$ 3.865*                                    |
| <b>OB.S/BS(%)</b> | 15.489 $\pm$ 0.706                         | 13.011 $\pm$ 1.42*                                     |

## Supplemental experimental procedures

### Mouse genotyping

Genomic DNA was extracted from mouse tails and used for genotyping by PCR using the following sets of primers. *p38<sup>α</sup><sup>ff</sup>* -F: 5'-TCCTACGAGCGTCGGCAAGGTG-3'; *p38<sup>α</sup><sup>ff</sup>* -R: 5'-AGTCCCCGAGAGTTCCTGCCTC-3'; *Cre*-F: 5'-TTTCCCGCAGAACCTGAAGA-3'; *Cre*-R: 5'-GGTGCTAACCAGCGTTTTTCGT-3'. *Rosa-LacZ*: *Rosa26<sup>WT</sup>*-F: 5'-GGAGCGGGAGAAATGGATATG-3'; *Rosa26<sup>WT</sup>*-R: 5'-AAAGTCGCTCTGTGTTAT-3'; *Rosa26*-F: 5'-AAGCACGTTTCCGACTTGAGTTG-3'; *Rosa26*-R: 5'-CATCAAGGAAACCCTGGACTACTG-3'; *Rosa-tdTomato*: oIMR9020: 5'-AAGGGAGCTGCAGTGGAGTA-3'; oIMR9021: 5'-CCGAAAATCTGTGGGAAGTC-3'; oIMR9103: 5'-GGCATTAAAGCAGCGTATCC-3'; oIMR9105: 5'-CTGTTCTGTACGGCATGG-3'.

### Cell Transfection

Cells were plated and transfected with *Creb* siRNA (sc-35111), *Tak1* siRNA (sc-36607), *Nf-κb p65* siRNA (sc-29411), or control siRNA (sc-37007) using Lipofectamine 2000 (Invitrogen). These cells were harvested after 72-96 hours and total RNA and protein were isolated.

### Quantitative PCR

Total RNA was isolated from the cells or femurs with Trizol reagent (Invitrogen). Reverse transcription was performed using Transcriptor First strand cDNA synthesis kit (Roche) with random anchored-oligo (dT) 18 primers. Real-time PCRs were performed using FS Universal SYBR Green Master Premix (Roche). Quantification was normalized to the amounts of endogenous *Gapdh*. The primers used for real-time PCR were:

*Osteocalcin* F: 5'-AGCAGGAGGGCAATAAGGTAGT-3'

R: 5'-ACCGTAGATGCGTTTGTAGGC-3'.

*Runx2* F: 5'-TTTAGGGCGCATTTCCTCATC-3'

R: 5'-TGTCCTTGTGGATTAAGGACTTG-3'

*Osterix* F: 5'-ACTCATCCCTATGGCTCGTG-3'

R: 5'-GGTAGGGAGCTGGGTTAAGG-3'

*C/ebpa* F: 5'-TGGACAAGAACAGCAACGAG-3'

R: 5'-AATCTCCTAGTCCTGGCTTG-3'

*Ppar $\gamma$*  F: 5'-ACTGCCTATGAGCTCTTCAC-3'

R: 5'-CAATCGGATGGTTCTTCGGA-3'

*Collagen type I $\alpha$*  F: 5'-CAAGGTCCTTCTGGATCAAGTG-3'

R: 5'-CCTTTATGCCTCTGTCACCTTG-3'

*Atf4* F: 5'-TTCCACTCCAGAGCATTCT-3'

R: 5'-CAGGTGGGTCATAAGGTTTG-3'

*Alp* F: 5'-TGAGCGACACGGACAAGA-3'

R: 5'-GGCCTGGTAGTTGTTGTGAG-3'

*Sox9* F: 5'-AGTCCCAGCGAACGCACATCA-3'

R: 5'-GTCGTATTGCGAGCGGGTGAT-3'

*Opg* F: 5'-CACCTGTGTGAAGAGGCCT-3'

R: 5'-GCAGGCTCTCCATCAAGGCA-3'

*M-csf* F: 5'-CTGACACAGGCCATGTGGAG-3'

R: 5'-GAGAGGGTAGTGGTGGATGT-3'

*Rankl* F: 5'-GCA CAC CTC ACC ATC AAT GCT-3'

R: 5'-GGT ACC AAG AGG ACA GAG TGA CTT TA-3'

*Fra-1* F: 5'-GCAGAAACCGAAGAAAGGAG-3'

R: 5'-CCGATTTCTCATCCTCCAAT-3'.

*Era* F: 5'- TCCTTCTAGACCCTTCAGTGA-3'

R: 5'- ACATGTCAAAGATCTCCACCATGCC-3'.

*Er $\beta$*  F: 5'- AAAGCCAAGAGAAACGGTGGGCAT-3'

R: 5'- GCCAATCATGTGCACCAGTTCCTT-3'.

*Gapdh* F: 5'-CCACAGTCCATGCCATCAC-3'

R: 5'-CATACCAGGAAATGAGCTTGAC-3'.

### **Western blot analysis**

The following antibodies were used: p38 $\alpha$  MAPK (Cell Signaling, 9212), p-p38MAPK (T180/182) (Cell Signaling, 9211), p53 (c12) (Cell Signaling, 2524), TAK1 (Cell Signaling, 4505), p-TAK1(T184/187) (Cell Signaling, 4531), CREB (Upstate, 05767), p-CREB (Upstate, 6519), p-NF- $\kappa$ B p65 (Ser536) (Cell Signaling, 3031), NF- $\kappa$ B p65 (Cell Signaling, 4767), Estrogen Receptor  $\alpha$  (Abcam, ab37438), NF- $\kappa$ B p50/52 (Santa Cruz, sc-8414), p21 (BD, 556430), p16 (Santa Cruz, sc-1207), and  $\beta$ -ACTIN (Santa Cruz, sc-81178).

### Chromatin immunoprecipitation (ChIP) primer sequences

Quantitative PCR was carried out to determine the promoter fragments of *Opg* using the following gene-specific primer sets:

0—101site F:5'-cagaggcaggcagaggcag-3'R :5'-tgtctatgtagctctgcct-3'  
-101—201site F:5'-gtaaatttctattagc-3' R:5'-catttaaatcatatataaa-3'  
-201—301site F:5'-ttttacttgctgtctcct-3' R:5'-acattctgagacatagatt-3'  
-301—401site F:5'-catacctttggagggtag -3' R:5'-gaagtcctaccctaactt-3'  
-401—501site F:5'-aaattgtcacatcacatc-3' R:5'-cttgagctagaagtgcaga-3'  
-501—601site F:5'-acaccttgccctagggaaatg-3' R:5'-cagaattggcctgtgggtc-3'  
-601—701site F:5'-tgtagataatcaatctctc-3' R:5'-aacatttttctcaaaatg-3'  
-701—801site F:5'-tcagctaataatcccagaca-3' R:5'-acttaccatccaataaac-3'  
-801—901site F:5'-gttggtatcacactgttgt-3' R:5'-gttcactccatcaagacat-3'  
-901—1001site F:5'-tactttgaactcatgatag-3' R:5'-tagtgagatgtctcctgag-3'  
-1001—1201siteF:5'-accagctcctgatagaga -3' R:5'-tctcaagtcagctgtaggt-3'  
-1201—1301siteF:5'-gttgccctatggcatcttgg-3' R:5'-gatttgcaaaataagggtc-3'  
-1301—1401siteF:5'-tttaaacgtgccaacagca-3' R:5'-ttgttgctccttagagtc-3'  
-1401—1501siteF:5'-ccctttatgaaaggatg-3' R:5'-tcagaagctagggagaacc-3'  
-1501—1601siteF:5'-caaccaggtaaataatgag-3' R:5'-attgtcctgaaaaacgact-3'  
-1601—1701siteF: 5'-gccatccctacgcgagagg-3'R:5'-ctttctgggagaaggctga-3'  
-1701—1801siteF:5'-ggtacagtgactgagacat-3' R:5'-gtacactgggggagccgc-3'  
-1801—1901siteF:5'-tcagcctctcaccacagg-3' R:5'-aagaacaaggcagcagctg-3'  
-1901—2001siteF:5'-cagctcagcgggtgctttc-3' R:5'-gcgcggaggcgtgggacaa-3'
